# Supplementary material
Source: PubMed Central journal article supplement (PMC5613764)
Supplement: NIHMS851816-supplement-Supplemental_Material.pdf [file NIHMS851816-supplement-Supplemental_Material.pdf]

## SUPPLEMENTAL MATERIAL

### Neuronal Death Following Hemorrhagic Stroke *in vitro* Shares Features of Ferroptosis and Necroptosis

Marietta Zille, PhD; Saravanan S. Karuppagounder, PhD; Yingxin Chen, MD; Peter J. Gough, D. Phil.; John Bertin, PhD; Joshua Finger, MS; Teresa A. Milner, PhD; Elizabeth A. Jonas, MD; Rajiv R. Ratan, MD, PhD\*

#### Chemicals and Reagents

DPQ (cat. #14450) was obtained from Cayman Chemical. 3-Methyladenine (#BML-AP502-0025), Mdivi-1 (#BML-CM127-0010) Necrostatin-1 (#BML-AP309-0020), Trolox (#ALX-270-267-M100), and z-VAD-fmk (#ALX-260-138-R100) were purchased from Enzo Life Sciences. Bafilomycin A1 (#B-1080), Cyclosporine A (#C-6000), Olaparib (#O-9201), SB 203580 (#S-3400), SP600125 (#S-7979), U0126 (#U-6770) were obtained from LC Laboratories. Necrostatin-1 inactive (#480066), mouse Tumor Necrosis Factor- $\alpha$  (#GF027), and U0124 (#662006) were from Millipore, Hemoglobin (#0855914) from MP Biomedicals, 3-(4,5-dimethylthiazol-2-yl)-2,5-diphenyltetrazolium bromide (MTT assay, #G4100) from Promega, Erastin from Selleck Chemicals (#S7242). Actinomycin D (#A1410), Chloroquine (#C6628), Cycloheximide (#01810) Deferoxamine (#D9533), Ferrostatin-1 (#SML0583), Hemin (#H9039), L-homocysteate (#H9633), N-acetylcysteine (#A7250), Rapamycin (#R8781), collagenase (#C2399), protease inhibitor cocktail (#P8340), Ethylene glycol-bis(2-aminoethylether)-N,N,N',N'-tetraacetic acid (EGTA, #E0396), sodium orthovanadate (#S6508), mouse anti- $\gamma$ -tubulin (clone GTU-88, #T6557, 1:20,000), mouse anti- $\beta$ -actin (clone AC-74, #A5316, 1:20,000), and Tween 20 (#P7949) were obtained from Sigma. Triton X-100 (#161-0407), Quick Start Bradford Reagent (#500-0205) and Protein Dual Color Standard (#161-0374) were purchased from Bio-Rad. Dulbecco's modified Eagle's medium (DMEM, #11965118), MEM GlutaMAX Supplement (#41090101), fetal bovine serum (#16140071), horse serum (#26050088), penicillin-streptomycin (#15140163), Live/dead assay (#L3224), NuPAGE 4-12% Bis-Tris protein gels (#NP0335 and #NP0336), MES SDS Running Buffer (#NP0002), Taqman RIP1 (#Mm00436354\_m1), RIP3 (Mm00444947\_m1) mouse primers,  $\beta$ -actin endogenous control VIC (#4352341E), Taqman RNA-to-CT 1-Step Kit (#4392656), and MicroAmp 96-well Reaction Plates (#4346906) were purchased from Thermo Fisher Scientific. Laemmli SDS Sample Buffer (#BP-110R), Transfer Buffer (#BP-190), and Tris-Buffered Saline (#BM-300) were obtained from Boston BioProducts. Methanol (#BDH1135) was purchased from VWR. Rabbit anti-ERK1/2 (#9102, 1:5000) and rabbit anti-phospho-ERK1/2 (#9101, 1:1000, recognizing phosphorylation of threonine 202 and tyrosine 204 of ERK1 or threonine 185 and tyrosine 187 of ERK2) antibodies were obtained from Cell Signaling. Rabbit anti-phospho-S166 RIP1 antibody (1:2000) was provided by P.J.G., J.B., and J.F. (GlaxoSmithKline). Nitrocellulose membrane 0.2 $\mu$ m (#10600001) was from GE Healthcare. Odyssey Blocking Buffer (#927-40010), goat anti-rabbit 680RD (#926-68071, 1:20,000), and goat anti-mouse 800CW (#926-32210, 1:20,000) were purchased from LI-COR Biosciences. NucleoSpin RNA isolation kit (#740955) was obtained from

Clontech. Epon-812 (#14120), glutaraldehyde (#16220), osmium tetroxide (#19100), and propylene oxide (#20401) were purchased from Electron Microscopy Sciences.

3-Methyladenine, Actinomycin D, Bafilomycin A1, Cycloheximide, Cyclosporine A, DPQ, Erastin, Ferrostatin-1, Mdivi-1, Necrostatin-1, Necrostatin-1 inactive, Olaparib, Rapamycin, SB 203580, SP600125, U0124, U0126, and z-VAD-fmk were dissolved in DMSO. Chloroquine, Deferoxamine, Hemoglobin, N-acetylcysteine were dissolved in water, Tumor Necrosis Factor- $\alpha$  in PBS, and Trolox in ethanol. Hemin was dissolved in NaOH and further diluted in water to 10mM stock solution. L-homocysteate was dissolved in MEM and further diluted in water to 250mM stock solution.

### Detailed Statistical Analysis

#### 1) Supporting Figure 1:

- 0.5 and 1 $\mu$ M Ferrostatin-1: Kolmogorov-Smirnov test,  $Z=0.925$ ,  $p=0.359$ ; Levené test,  $F(4,20)=2.293$ ,  $p=0.095$ ; one-way ANOVA,  $F(4,20)=17.960$ ,  $p<0.001$ , partial- $\eta^2=0.782$ ; posthoc Bonferroni  $p<0.001$
- 25, 50, and 100 $\mu$ M Deferoxamine: Kolmogorov-Smirnov test,  $Z=0.929$ ,  $p=0.354$ ; Levené test,  $F(4,15)=1.343$ ,  $p=0.300$ ; one-way ANOVA,  $F(4,15)=24.168$ ,  $p<0.001$ , partial- $\eta^2=0.866$ ; posthoc Bonferroni  $p<0.001$
- 1mM N-acetylcysteine: Kolmogorov-Smirnov test,  $Z=1.000$ ,  $p=0.270$ ; Levené test,  $F(4,15)=1.939$ ,  $p=0.156$ ; one-way ANOVA,  $F(4,15)=9.255$ ,  $p=0.001$ , partial- $\eta^2=0.712$ ; posthoc Bonferroni  $p=0.001$
- 10 and 100 $\mu$ M Trolox: Kolmogorov-Smirnov test,  $Z=0.879$ ,  $p=0.423$ ; Levené test,  $F(4,25)=1.530$ ,  $p=0.224$ ; one-way ANOVA,  $F(4,25)=10.580$ ,  $p<0.001$ , partial- $\eta^2=0.629$ ; posthoc Bonferroni  $p=0.015$  for 10 $\mu$ M,  $p<0.001$  for 100 $\mu$ M Trolox
- U0126: Kolmogorov-Smirnov test,  $Z=0.984$ ,  $p=0.288$ ; Levené test,  $F(8,73)=3.173$ ,  $p=0.004$ ; Kruskal-Wallis test,  $\chi^2(8,N=82)=55.242$ ,  $p<0.001$ ,  $\eta^2=0.682$ ; since variances were not homogenous across groups, nonparametric omnibus test Kruskal-Wallis was performed followed by posthoc Mann-Whitney U with Bonferroni correction at  $\alpha=0.05/k$ , with  $k=12$  (comparison of four different concentration of U0126 and U0124 vs. vehicle-treated cells and additional four comparisons of U0126 vs. U0124). Thus, differences were only significant when  $p$  was smaller than corrected  $\alpha=0.0042$ . posthoc Mann-Whitney U  $p<0.001$  for 5, 10, and 20 $\mu$ M U0126 vs. vehicle as well as for 5 and 10 $\mu$ M of U0126 vs. the same concentrations of U0124
- 50 and 100 $\mu$ M Necrostatin-1 vs. vehicle: Kolmogorov-Smirnov test,  $Z=0.657$ ,  $p=0.781$ ; Levené test,  $F(8,28)=2.227$ ,  $p=0.056$ ; one-way ANOVA,  $F(8,28)=3.853$ ,  $p=0.004$ , partial- $\eta^2=0.524$ ; posthoc Bonferroni  $p=0.003$  for 50 $\mu$ M,  $p=0.004$  for 100 $\mu$ M, but not vs. the same concentration of Necrostatin-1i ( $p>0.05$ )
- 2x2 contingency table: Fisher's exact test, two-tailed  $p=1.00$

#### 2) Supporting Figure 2:

- 0.1, 0.5, and 1 $\mu$ M Ferrostatin-1: Kolmogorov-Smirnov test,  $Z=1.205$ ,  $p=0.109$ ; Levené test,  $F(4,25)=2.428$ ,  $p=0.074$ ; one-way ANOVA,  $F(4,25)=19.812$ ,  $p<0.001$ , partial- $\eta^2=0.760$ ; posthoc Bonferroni  $p=0.004$  for 0.1 $\mu$ M,  $p<0.001$  for 0.5 and 1 $\mu$ M

- 25 and 50 $\mu$ M Deferoxamine: Kolmogorov-Smirnov test,  $Z=0.495$ ,  $p=0.967$ ; Levené test,  $F(4,15)=2.157$ ,  $p=0.124$ ; one-way ANOVA,  $F(4,15)=6.869$ ,  $p=0.002$ ,  $\text{partial-}\eta^2=0.647$ ; posthoc Bonferroni  $p=0.001$  for 25 $\mu$ M,  $p=0.028$  for 50 $\mu$ M DFO
- 10, 20, and 30 $\mu$ M N-acetylcysteine: Kolmogorov-Smirnov test,  $Z=1.240$ ,  $p=0.092$ ; Levené test,  $F(5,30)=2.331$ ,  $p=0.067$ ; one-way ANOVA,  $F(5,30)=50.071$ ,  $p<0.001$ ,  $\text{partial-}\eta^2=0.893$ ; posthoc Bonferroni  $p=0.010$  for 10 $\mu$ M,  $p<0.001$  for 20 and 30 $\mu$ M NAC
- 100 $\mu$ M Trolox: Kolmogorov-Smirnov test,  $Z=0.829$ ,  $p=0.498$ ; Levené test,  $F(4,15)=0.996$ ,  $p=0.440$ ; one-way ANOVA,  $F(4,15)=7.652$ ,  $p=0.001$ ,  $\text{partial-}\eta^2=0.671$ ; posthoc Bonferroni  $p=0.002$
- U0126: Kolmogorov-Smirnov test,  $Z=1.438$ ,  $p=0.032$ ; Levené test,  $F(8,45)=7.941$ ,  $p<0.001$ ; Kruskal-Wallis test,  $\chi^2(8,N=54)=47.158$ ,  $p<0.001$ ,  $\eta^2=0.890$ ; since variances were not homogenous across groups, nonparametric omnibus test Kruskal-Wallis was performed followed by posthoc Mann-Whitney U with Bonferroni correction at  $\alpha=0.0042$  considered significant (see above). posthoc Mann-Whitney U  $p=0.004$  for 5, 10, and 20 $\mu$ M U0126 vs. vehicle and 1, 5, 10, and 20 $\mu$ M U0126 vs. the same concentrations of U0124
- 50 and 100 $\mu$ M Necrostatin-1 vs. vehicle and the same concentrations of Necrostatin-1i: Kolmogorov-Smirnov test,  $Z=0.750$ ,  $p=0.627$ ; Levené test,  $F(8,36)=1.342$ ,  $p=0.255$ ; one-way ANOVA,  $F(8,36)=39.220$ ,  $p<0.001$ ,  $\text{partial-}\eta^2=0.897$ ; posthoc Bonferroni  $p<0.001$ )

### 3) Supporting Figure 3:

- A, phospho-ERK/ERK protein fold-change: median of 1.21 at 2 hours, 2.45 at 4 hours, 2.13 at 8 hours, and 2.61 at 16 hours of 100 $\mu$ M hemin, 2.00 at 8 hours of 5mM glutamate; Kolmogorov-Smirnov test,  $Z=0.908$ ,  $p=0.382$ ; Levené test,  $F(5,24)=2.684$ ,  $p=0.046$ ; Kruskal-Wallis test,  $\chi^2(5,N=30)=14.790$ ,  $p=0.011$ ,  $\eta^2=0.510$ ; since variances were not homogenous across groups, nonparametric omnibus test Kruskal-Wallis was performed followed by posthoc Mann-Whitney U with Bonferroni correction at  $\alpha=0.05/k$ , with  $k=5$  (comparison of 2, 4, 8, and 16 hours 100 $\mu$ M hemin as well as 8 hours 5mM glutamate treatment to 0 hours). Thus, differences were only significant when  $p$  was smaller than corrected  $\alpha=0.01$ . posthoc Mann-Whitney U  $p=0.005$  for 4, 8, 16 hours 100 $\mu$ M hemin and 8 hours 5mM glutamate treatment
- B, phospho-ERK/ERK protein fold-change at 8 hours: median of 1.638 for 100 $\mu$ M hemin, 0.377 for 10 $\mu$ M U0126, 0.640 for 10 $\mu$ M U0126 with hemin, 0.981 for 10 $\mu$ M U0124, 1.831 for 10 $\mu$ M U0124 with hemin; Kolmogorov-Smirnov test,  $Z=1.095$ ,  $p=0.182$ ; Levené test,  $F(5,36)=4.112$ ,  $p=0.005$ ; Kruskal-Wallis test,  $\chi^2(5,N=42)=31.457$ ,  $p<0.001$ ,  $\eta^2=0.767$ ; since variances were not homogenous across groups, nonparametric omnibus test Kruskal-Wallis was performed followed by posthoc Mann-Whitney U with Bonferroni correction at  $\alpha=0.05/k$ , with  $k=9$  (comparison of vehicle vs. hemin for all three conditions, comparison of the three vehicle and three hemin conditions against each other). Thus, differences were only significant when  $p$  was smaller than corrected  $\alpha=0.0056$ . posthoc Mann-Whitney U  $p=0.001$  for vehicle vs. 100 $\mu$ M hemin or vs. 10 $\mu$ M U0126,

- p=0.003 for 10 $\mu$ M U0124 vs. 10 $\mu$ M U0124 with hemin as well as 10 $\mu$ M U0126 with hemin vs. hemin or vs. 10 $\mu$ M U0124 with hemin
- C, phospho-ERK/ERK protein fold-change: mean $\pm$ SD of 1.313 $\pm$ 0.332 at 3 hours, 1.773 $\pm$ 0.380 at 6 hours, 1.355 $\pm$ 0.309 at 12 hours, and 1.737 $\pm$ 0.802 at 24 hours of ICH; Kolmogorov-Smirnov test, Z=0.786, p=0.566; Levené test, F(4,28)=1.740, p=0.169; one-way ANOVA, F(4,28)=4.288, p=0.008, partial- $\eta^2$ =0.380; posthoc Bonferroni p=0.014 for ICH 6h and p=0.034 for ICH 24h vs. sham
  - D, RIP1 mRNA fold-change in hemin: median of 0.725 at 2 hours, 0.870 at 4 hours, 4.939 at 8 hours, and 14.932 at 16 hours; Kolmogorov-Smirnov test, Z=1.991, p=0.001; Levené test, F(4,40)=17.916, p<0.001; Kruskal-Wallis test,  $\chi^2$ (4,N=45)=31.323, p<0.001,  $\eta^2$ =0.712; since variances were not homogenous across groups, nonparametric omnibus test Kruskal-Wallis was performed followed by posthoc Mann-Whitney U with Bonferroni correction at  $\alpha$ =0.05/k, with k=4 (comparison of 2, 4, 8, and 16 hours 100 $\mu$ M hemin to 0 hours). Thus, differences were only significant when p was smaller than corrected  $\alpha$ =0.0125. posthoc Mann-Whitney U p=0.003 hours for 8 and p<0.001 for 16 hours compared to 0 hours treatment
  - D, RIP3 mRNA fold-change in hemin: median of 0.752 at 2 hours, 0.959 at 4 hours, 2.769 at 8 hours, and 3.307 at 16 hours; Kolmogorov-Smirnov test, Z=2.147, p<0.001; Levené test, F(4,40)=9.425, p<0.001; Kruskal-Wallis test,  $\chi^2$ (4,N=45)=14.449, p=0.006,  $\eta^2$ =0.328; since data were not normally distributed and variances not homogenous, nonparametric omnibus test Kruskal-Wallis was performed followed by posthoc Mann-Whitney U with Bonferroni correction at  $\alpha$ =0.0125 considered significant (see above). posthoc Mann-Whitney U p=0.003 for 16 hours compared to 0 hours treatment
  - D, RIP1 mRNA fold-change in ICH: mean $\pm$ SD of 1.000 $\pm$ 0.171 for sham vs. 3.206 $\pm$ 0.187 for ICH at 24 hours; Kolmogorov-Smirnov test, Z=0.702, p=0.709; Levené test, F(1,4)=0.078, p=0.794; Student's t-test, t(4)=-15.084, p<0.001, r=0.987
  - D, RIP3 mRNA fold-change in ICH: mean $\pm$ SD of 1.000 $\pm$ 0.100 for sham vs. 15.742 $\pm$ 2.616 for ICH at 24 hours; Kolmogorov-Smirnov test, Z=0.765, p=0.602; Levené test, F(1,4)=7.261, p=0.054; Student's t-test, t(4)=-9.752, p=0.001, r=0.970
  - D, phospho-RIP1 S166 protein fold-change: median of 1.430 at 2 hours, 1.595 at 4 hours, 2.240 at 8 hours, 1.960 at 12 hours, 1.130 at 24 hours, 1.620 at 12 hours + Nec-1, 8.015 at 8 hours 100ng/ml TNF $\alpha$  + 5 $\mu$ M zVAD, and 1.430 at 8h TNF $\alpha$ /zVAD + Nec-1; Kolmogorov-Smirnov test, Z=2.299, p<0.001; Levené test, F(8,63)=5.049, p<0.001; Kruskal-Wallis test,  $\chi^2$ (8,N=72)=40.666, p<0.001,  $\eta^2$ =0.573; since data were not normally distributed and variances not homogenous, nonparametric omnibus test Kruskal-Wallis was performed followed by posthoc Mann-Whitney U with Bonferroni correction at  $\alpha$ =0.05/k, with k=10 (comparison of 2, 4, 8, 12, 24 hours, 12 hours + Nec-1, 8 hours TNF $\alpha$ /zVAD  $\pm$  Nec-1 to 0 hours, 12 hours + Nec-1 to 12 hours, and 8 hours TNF $\alpha$ /zVAD + Nec-1 to 8 hours TNF $\alpha$ /zVAD). Thus, differences were only significant when p was smaller than corrected  $\alpha$ =0.005. posthoc Mann-Whitney U p<0.001 for 4-12 hours hemin and 8 hours TNF $\alpha$ /zVAD compared to 0 hours

treatment and  $p=0.001$  for 8 hours TNF $\alpha$ /zVAD + Nec-1 compared to 8 hours TNF $\alpha$ /zVAD.

4) Supporting Figure 4:

- B, necrotic cells: mean $\pm$ SD of  $6.941\pm 7.467\%$  for vehicle- vs.  $39.538\pm 14.503\%$  for hemin-treated cells; Kolmogorov-Smirnov test,  $Z=0.419$ ,  $p=0.995$ ; Levené test,  $F(1,4)=1.306$ ,  $p=0.317$ ; Student's t-test,  $t(4)=-3.461$ ,  $p=0.026$ ,  $r=0.816$
- B, apoptotic cells: mean $\pm$ SD of  $0.741\pm 1.283\%$  for vehicle- vs.  $0.794\pm 1.375\%$  for hemin-treated cells; Kolmogorov-Smirnov test,  $Z=0.997$ ,  $p=0.273$ ; Levené test,  $F(1,4)=0.038$ ,  $p=0.855$ ; Student's t-test,  $t(4)=-0.049$ ,  $p=0.963$ ,  $r=0.020$
- C, mitochondrial size: mean $\pm$ SD of  $4.967\pm 0.277\%$  area mitochondria/cytoplasm for vehicle- vs.  $6.498\pm 1.279\%$  for hemin-treated cells; Kolmogorov-Smirnov test,  $Z=0.728$ ,  $p=0.665$ ; Levené test,  $F(1,4)=3.887$ ,  $p=0.120$ ; Student's t-test,  $t(4)=-2.027$ ,  $p=0.113$ ,  $r=0.637$

5) Supporting Figure 5:

- A, 1 $\mu$ M Ferrostatin-1: Kolmogorov-Smirnov test,  $Z=1.452$ ,  $p=0.029$ ; Levené test,  $F(7,48)=3.422$ ,  $p=0.005$ ; Kruskal-Wallis test,  $\chi^2(7,N=56)=34.678$ ,  $p<0.001$ ,  $\eta^2=0.631$ ; since data was not normally distributed and variances were not homogenous across groups, nonparametric omnibus test Kruskal-Wallis was performed followed by posthoc Mann-Whitney U with Bonferroni correction at  $\alpha=0.05/k$ , with  $k=7$  (comparison of addition of Ferrostatin-1 at 0-12 hours compared with hemin treatment alone). Thus, differences were only significant when  $p$  was smaller than corrected  $\alpha=0.00714$ . posthoc Mann-Whitney U  $p=0.002$  for addition of Ferrostatin-1 at 0 to 8 hours compared with hemin treatment alone
- A, 100 $\mu$ M Deferoxamine: Kolmogorov-Smirnov test,  $Z=0.988$ ,  $p=0.283$ ; Levené test,  $F(7,34)=2.500$ ,  $p=0.035$ ; Kruskal-Wallis test,  $\chi^2(7,N=42)=28.583$ ,  $p<0.001$ ,  $\eta^2=0.697$ ; since variances were not homogenous across groups, nonparametric omnibus test Kruskal-Wallis was performed followed by posthoc Mann-Whitney U with Bonferroni correction at  $\alpha=0.05/k$ , with  $k=7$  (comparison of addition of Deferoxamine at 0-12 hours compared with hemin treatment alone). Thus, differences were only significant when  $p$  was smaller than corrected  $\alpha=0.00714$ . posthoc Mann-Whitney U  $p=0.004$  for addition of Deferoxamine at 0 to 4 hours compared with hemin treatment alone
- A, 1mM N-acetylcysteine: Kolmogorov-Smirnov test,  $Z=0.923$ ,  $p=0.362$ ; Levené test,  $F(7,42)=1.715$ ,  $p=0.132$ ; one-way ANOVA,  $F(7,42)=22.360$ ,  $p<0.001$ , partial- $\eta^2=0.788$ ; posthoc Bonferroni  $p<0.001$  for addition of N-acetylcysteine at 0 or 2 hours compared with hemin treatment alone
- A, 100 $\mu$ M Trolox: Kolmogorov-Smirnov test,  $Z=1.016$ ,  $p=0.253$ ; Levené test,  $F(7,33)=1.894$ ,  $p=0.102$ ; one-way ANOVA,  $F(7,33)=12.291$ ,  $p<0.001$ , partial- $\eta^2=0.723$ ; posthoc Bonferroni  $p<0.001$  for addition of Trolox at 0 to 4 hours compared with hemin treatment alone,  $p=0.005$  for 6 hours, and  $p=0.035$  for 8 hours
- A, 10 $\mu$ M U0126: Kolmogorov-Smirnov test,  $Z=1.354$ ,  $p=0.051$ ; Levené test,  $F(7,37)=0.459$ ,  $p=0.857$ ; one-way ANOVA,  $F(7,37)=40.239$ ,  $p<0.001$ , partial-

- $\eta^2=0.884$ ; posthoc Bonferroni  $p<0.001$  for addition of U0126 at 0 to 8 hours compared with hemin treatment alone
- A, 100 $\mu$ M Necrostatin-1: Kolmogorov-Smirnov test,  $Z=0.493$ ,  $p=0.968$ ; Levené test,  $F(7,37)=0.699$ ,  $p=0.673$ ; one-way ANOVA,  $F(7,37)=10.982$ ,  $p<0.001$ , partial- $\eta^2=0.884$ ; posthoc Bonferroni  $p<0.001$  for addition of Necrostatin-1 at 0, 2, and 6 hours,  $p=0.001$  for 4 hours, and  $p=0.019$  for 8 hours compared with hemin treatment alone
  - B, RIP1 mRNA fold-change: median of 1.863 for 100 $\mu$ M hemin, 0.677 for 10 $\mu$ M U0126, 1.387 for 10 $\mu$ M U0126 with 100 $\mu$ M hemin, 0.930 for 10 $\mu$ M U0124, and 1.954 for 10 $\mu$ M U0124 with 100 $\mu$ M hemin; Kolmogorov-Smirnov test,  $Z=1.270$ ,  $p=0.080$ ; Levené test,  $F(5,42)=5.902$ ,  $p<0.001$ ; Kruskal-Wallis test,  $\chi^2(5,N=48)=19.411$ ,  $p=0.002$ ,  $\eta^2=0.413$ ; since variances were not homogenous across groups, nonparametric omnibus test Kruskal-Wallis was performed followed by posthoc Mann-Whitney U with Bonferroni correction at  $\alpha=0.05/k$ , with  $k=9$  (comparison of vehicle vs. hemin for all three conditions, comparison of the three vehicle and three hemin conditions against each other). Thus, differences were only significant when  $p$  was smaller than corrected  $\alpha=0.0056$ . posthoc Mann-Whitney U  $p<0.001$  for 100 $\mu$ M hemin vs. vehicle,  $p=0.027$  for 100 $\mu$ M hemin with 10 $\mu$ M U0126 vs. 10 $\mu$ M U0126,  $p=0.046$  for 100 $\mu$ M hemin with 10 $\mu$ M U0124 vs. 10 $\mu$ M U0124, and  $p=0.248$  for 10 $\mu$ M U0126 with 100 $\mu$ M hemin vs. 100 $\mu$ M hemin
  - C, RIP3 mRNA fold-change: median of 2.572 for 100 $\mu$ M hemin, 0.711 for 10 $\mu$ M U0126, 1.793 for 10 $\mu$ M U0126 with 100 $\mu$ M hemin, 0.870 for 10 $\mu$ M U0124, and 1.896 for 10 $\mu$ M U0124 with 100 $\mu$ M hemin; Kolmogorov-Smirnov test,  $Z=1.317$ ,  $p=0.062$ ; Levené test,  $F(5,42)=14.034$ ,  $p<0.001$ ; Kruskal-Wallis test,  $\chi^2(5,N=48)=37.207$ ,  $p<0.001$ ,  $\eta^2=0.792$ ; since variances were not homogenous across groups, nonparametric omnibus test Kruskal-Wallis was performed followed by posthoc Mann-Whitney U with Bonferroni correction at  $\alpha=0.05/k$ , with  $k=9$  (comparison of vehicle vs. hemin for all three conditions, comparison of the three vehicle and three hemin conditions against each other). Thus, differences were only significant when  $p$  was smaller than corrected  $\alpha=0.0056$ . posthoc Mann-Whitney U  $p<0.001$  for 100 $\mu$ M hemin vs. vehicle,  $p=0.002$  for 100 $\mu$ M hemin with 10 $\mu$ M U0126 vs. 10 $\mu$ M U0126,  $p=0.001$  for 100 $\mu$ M hemin with 10 $\mu$ M U0124 vs. 10 $\mu$ M U0124, and  $p=0.074$  for 10 $\mu$ M U0126 with 100 $\mu$ M hemin vs. 100 $\mu$ M hemin
  - D, phospho-RIP1 S166 protein fold-change: median of 1.370 at 4 hours, 1.460 at 4 hours + 10 $\mu$ M U0126, 1.910 at 8 hours, 1.700 at 8 hours + 10 $\mu$ M U0126, 2.220 at 12 hours, 1.600 at 12 hours + 10 $\mu$ M U0126, 1.390 at 12 hours + 100 $\mu$ M Necrostatin-1, 2.120 at 8 hours 100ng/ml TNF $\alpha$  + 5 $\mu$ M zVAD, and 1.370 at 8h TNF $\alpha$ /zVAD + Nec-1; Kolmogorov-Smirnov test,  $Z=1.865$ ,  $p=0.002$ ; Levené test,  $F(9,59)=10.257$ ,  $p<0.001$ ; Kruskal-Wallis test,  $\chi^2(9,N=69)=30.598$ ,  $p<0.001$ ,  $\eta^2=0.450$ ; since data were not normally distributed and variances not homogenous, nonparametric omnibus test Kruskal-Wallis was performed followed by posthoc Mann-Whitney U with Bonferroni correction at  $\alpha=0.05/k$ , with  $k=9$  (comparison of 4, 8, and 12 hours hemin, and 8 hours TNF $\alpha$ /zVAD to 0 hours and respective time point + 10 $\mu$ M U0126 or 100 $\mu$ M Necrostatin-1). Thus,

differences were only significant when  $p$  was smaller than corrected  $\alpha=0.0056$ . posthoc Mann-Whitney U:  $p=0.017$  for 4 hours,  $p<0.001$  for 8 and 12 hours hemin as well as 8 hours TNF $\alpha$ /zVAD vs. 0 hours of hemin treatment;  $p=0.721$  for 4 hours + 10 $\mu$ M U0126,  $p=0.225$  for 8 hours + U0126, and  $p=0.277$  for 12 hours + U0126 vs. respective time point without U0126;  $p=0.064$  for 12 hours + Necrostatin-1 vs. 12 hours alone;  $p=0.009$  for 8 hours TNF $\alpha$ /zVAD + Necrostatin-1 compared to 8 hours TNF $\alpha$ /zVAD.

6) Supporting Figure 6:

- A, cell survival Necrostatin-1 dose-response with 0.5 $\mu$ M U0126 (sub-threshold dose) in hemin toxicity: Kolmogorov-Smirnov test,  $Z=1.069$ ,  $p=0.203$ ; Levené test,  $F(8,54)=2.211$ ,  $p=0.041$ ; Kruskal-Wallis test,  $\chi^2(8,N=63)=34.542$ ,  $p<0.001$ ,  $\eta^2=0.557$ ; since variances were not homogenous across groups, nonparametric omnibus test Kruskal-Wallis was performed followed by posthoc Mann-Whitney U with Bonferroni correction at  $\alpha=0.05/k$ , with  $k=8$  (comparison of 0.5 and 10 $\mu$ M U0126 and 10, 50, and 100 $\mu$ M Necrostatin-1 to hemin treatment alone; cotreatment of 0.5 $\mu$ M U0126 and different dosage of Necrostatin-1 vs. Necrostatin-1 alone). Thus, differences were only significant when  $p$  was smaller than corrected  $\alpha=0.00625$ . posthoc Mann-Whitney U  $p=0.004$  for 10 $\mu$ M U0126,  $p=0.009$  for 100 $\mu$ M Necrostatin-1 vs. hemin alone,  $p=0.565$  for 10 $\mu$ M Necrostatin-1 + 0.5 $\mu$ M U0126 vs. 10 $\mu$ M Necrostatin-1,  $p=0.085$  for 50 $\mu$ M Necrostatin-1 + 0.5 $\mu$ M U0126 vs. 50 $\mu$ M Necrostatin-1,  $p=0.225$  for 100 $\mu$ M Necrostatin-1 + 0.5 $\mu$ M U0126 vs. 100 $\mu$ M Necrostatin-1
- B, cell survival Necrostatin-1 dose-response with 0.5 $\mu$ M U0126 (sub-threshold dose) in hemoglobin toxicity: Kolmogorov-Smirnov test,  $Z=1.158$ ,  $p=0.137$ ; Levené test,  $F(8,36)=1.232$ ,  $p=0.309$ ; one-way ANOVA,  $F(8,36)=41.880$ ,  $p<0.001$ , partial- $\eta^2=0.903$ ; posthoc Bonferroni  $p<0.001$  for 50 and 100 $\mu$ M Necrostatin-1  $\pm$  0.5 $\mu$ M U0126 and 10 $\mu$ M U0126,  $p=1.000$  for 10, 50, and 100 $\mu$ M Necrostatin-1 + 0.5 $\mu$ M U0126

## Stroke Online Supplement

**Table 1. Checklist of Methodological and Reporting Aspects for Articles Submitted to *Stroke* Involving Preclinical Experimentation**

| Methodological and Reporting Aspects                 | Description of Procedures                                                                                                                                                                                                                                                                                                                                                                                                                                                                                                                                                                                                                                                                                                                                                                                                                                                                       |
|------------------------------------------------------|-------------------------------------------------------------------------------------------------------------------------------------------------------------------------------------------------------------------------------------------------------------------------------------------------------------------------------------------------------------------------------------------------------------------------------------------------------------------------------------------------------------------------------------------------------------------------------------------------------------------------------------------------------------------------------------------------------------------------------------------------------------------------------------------------------------------------------------------------------------------------------------------------|
| Experimental groups and study timeline               | <input checked="" type="checkbox"/> The experimental group(s) have been clearly defined in the article, including number of animals in each experimental arm of the study.<br><input checked="" type="checkbox"/> An account of the control group is provided, and number of animals in the control group has been reported. If no controls were used, the rationale has been stated.<br><input type="checkbox"/> An overall study timeline is provided. <i>N/A</i>                                                                                                                                                                                                                                                                                                                                                                                                                             |
| Inclusion and exclusion criteria                     | <input type="checkbox"/> A priori inclusion and exclusion criteria for tested animals were defined and have been reported in the article. <i>N/A</i>                                                                                                                                                                                                                                                                                                                                                                                                                                                                                                                                                                                                                                                                                                                                            |
| Randomization                                        | <input checked="" type="checkbox"/> Animals were randomly assigned to the experimental groups. If the work being submitted does not contain multiple experimental groups, or if random assignment was not used, adequate explanations have been provided.<br><input checked="" type="checkbox"/> Type and methods of randomization have been described.<br><input checked="" type="checkbox"/> Methods used for allocation concealment have been reported.                                                                                                                                                                                                                                                                                                                                                                                                                                      |
| Blinding                                             | <input type="checkbox"/> Blinding procedures have been described with regard to masking of group/treatment assignment from the experimenter. The rationale for nonblinding of the experimenter has been provided, if such was not feasible.<br><input checked="" type="checkbox"/> Blinding procedures have been described with regard to masking of group assignment during outcome assessment.                                                                                                                                                                                                                                                                                                                                                                                                                                                                                                |
| Sample size and power calculations                   | <input checked="" type="checkbox"/> Formal sample size and power calculations were conducted based on a priori determined outcome(s) and treatment effect, and the data have been reported. A formal size assessment was not conducted and a rationale has been provided.                                                                                                                                                                                                                                                                                                                                                                                                                                                                                                                                                                                                                       |
| Data reporting and statistical methods               | <input checked="" type="checkbox"/> Number of animals in each group: randomized, tested, lost to follow-up, or died have been reported. If the experimentation involves repeated measurements, the number of animals assessed at each time point is provided, for all experimental groups.<br><input type="checkbox"/> Baseline data on assessed outcome(s) for all experimental groups have been reported. <i>N/A</i><br><input type="checkbox"/> Details on important adverse events and death of animals during the course of experimentation have been provided, for all experimental arms. <i>N/A</i><br><input checked="" type="checkbox"/> Statistical methods used have been reported.<br><input checked="" type="checkbox"/> Numeric data on outcomes have been provided in text, or in a tabular format with the main article or as supplementary tables, in addition to the figures. |
| Experimental details, ethics, and funding statements | <input checked="" type="checkbox"/> Details on experimentation including stroke model, formulation and dosage of therapeutic agent, site and route of administration, use of anesthesia and analgesia, temperature control during experimentation, and postprocedural monitoring have been described.<br><input type="checkbox"/> Different sex animals have been used. If not, the reason/justification is provided. <i>N/A</i><br><input checked="" type="checkbox"/> Statements on approval by ethics boards and ethical conduct of studies have been provided.<br><input checked="" type="checkbox"/> Statements on funding and conflicts of interests have been provided.                                                                                                                                                                                                                  |
